# Supplementary material
Source: HighWire-hosted journal article supplement (https://www.jrheum.org/highwire/filestream/40793/field_highwire_adjunct_files/0/210075DataSuppl.pdf)
Supplement: 210075DataSuppl.pdf [file 210075DataSuppl.pdf]

**Supplementary Table 1. Clinical and demographic characteristics of patients with peripheral SpA stratified for the presence of psoriasis.**

| Variable                                   | DAPSA                                 |             |                                       |             | PASDAS                                |             |                                       |             | ASDAS                                 |             |                                       |             |
|--------------------------------------------|---------------------------------------|-------------|---------------------------------------|-------------|---------------------------------------|-------------|---------------------------------------|-------------|---------------------------------------|-------------|---------------------------------------|-------------|
|                                            | pSpA without psoriasis<br>(n = 49)    |             | pSpA with psoriasis<br>(n = 142)      |             | pSpA without psoriasis<br>(n = 42)    |             | pSpA with psoriasis<br>(n = 97)       |             | pSpA without psoriasis<br>(n = 82)    |             | pSpA with psoriasis<br>(n = 197)      |             |
|                                            | Patients with an available assessment | Value       | Patients with an available assessment | Value       | Patients with an available assessment | Value       | Patients with an available assessment | Value       | Patients with an available assessment | Value       | Patients with an available assessment | Value       |
| Age, years                                 | 49                                    | 53.0 (12.5) | 142                                   | 57.1 (11.1) | 42                                    | 54.5 (10.9) | 97                                    | 58.4 (9.9)  | 82                                    | 50.5 (13.4) | 197                                   | 58.0 (11.4) |
| Female, n (%)                              | 49                                    | 37 (75.5%)  | 142                                   | 66 (46.5%)  | 42                                    | 33 (78.6%)  | 97                                    | 43 (44.3%)  | 82                                    | 59 (72.0%)  | 197                                   | 111 (56.3%) |
| Symptom duration, years                    | 39                                    | 11.6 (8.5)  | 101                                   | 14.1 (9.3)  | 36                                    | 11.6 (8.7)  | 76                                    | 14.0 (8.7)  | 64                                    | 10.7 (8.4)  | 149                                   | 13.5 (9.4)  |
| Current NSAID use, n (%)                   | -                                     | 28 (57.1%)  | -                                     | 63 (44.4%)  | -                                     | 21 (50.0%)  | -                                     | 49 (50.5%)  | -                                     | 39 (47.6%)  | -                                     | 93 (47.2%)  |
| Current csDMARD use, n (%)                 | -                                     | 26 (53.1%)  | -                                     | 91 (64.1%)  | -                                     | 19 (45.2%)  | -                                     | 51 (52.6%)  | -                                     | 38 (46.3%)  | -                                     | 120 (60.9%) |
| Current bDMARD use, n (%)                  | -                                     | 27 (55.1%)  | -                                     | 70 (49.3%)  | -                                     | 21 (50.0%)  | -                                     | 55 (57.7%)  | -                                     | 42 (51.2%)  | -                                     | 95 (48.2%)  |
| Current glucocorticoid use, n (%)          | -                                     | 3 (6.4%)    | -                                     | 7 (4.9%)    | -                                     | 3 (7.1%)    | -                                     | 7 (7.2%)    | -                                     | 3 (3.7%)    | -                                     | 11 (5.6%)   |
| <b>Disease activity</b>                    |                                       |             |                                       |             |                                       |             |                                       |             |                                       |             |                                       |             |
| DAPSA (0-∞)                                | 49                                    | 10.6 (6.4)  | 142                                   | 9.7 (7.0)   | 39                                    | 9.7 (5.7)   | 90                                    | 9.4 (7.1)   | 45                                    | 9.8 (5.6)   | 114                                   | 9.6 (7.1)   |
| PASDAS (0-10)                              | 35                                    | 3.5 (1.4)   | 80                                    | 3.2 (1.4)   | 42                                    | 3.5 (1.5)   | 97                                    | 3.2 (1.3)   | 39                                    | 3.4 (1.5)   | 84                                    | 3.3 (1.3)   |
| ASDAS (0-∞)                                | 45                                    | 2.4 (1.0)   | 115                                   | 2.1 (1.0)   | 42                                    | 2.3 (1.0)   | 89                                    | 2.0 (1.0)   | 82                                    | 2.4 (1.0)   | 197                                   | 2.1 (1.0)   |
| BASDAI (0-10)                              | 46                                    | 4.7 (2.5)   | 116                                   | 4.0 (2.3)   | 41                                    | 4.6 (2.6)   | 91                                    | 3.9 (3.3)   | 82                                    | 4.5 (2.4)   | 197                                   | 3.9 (2.2)   |
| PGA (0-10)                                 | 49                                    | 4.6 (2.7)   | 142                                   | 3.8 (2.6)   | 41                                    | 4.5 (2.7)   | 97                                    | 3.6 (2.6)   | 82                                    | 4.4 (2.7)   | 197                                   | 3.8 (2.5)   |
| VAS pain (0-10)                            | 49                                    | 4.2 (2.5)   | 142                                   | 3.7 (2.6)   | 42                                    | 4.1 (2.4)   | 90                                    | 3.5 (2.6)   | 59                                    | 4.4 (2.4)   | 171                                   | 3.7 (2.6)   |
| PhGA (0-10)                                | 39                                    | 1.9 (1.4)   | 105                                   | 1.7 (1.5)   | 42                                    | 2.1 (1.6)   | 97                                    | 1.9 (1.4)   | 57                                    | 1.9 (1.6)   | 127                                   | 1.8 (1.6)   |
| CRP, mg/L (0-∞)                            | 49                                    | 4.6 (5.3)   | 142                                   | 4.4 (6.2)   | 42                                    | 3.8 (4.3)   | 97                                    | 4.1 (5.9)   | 82                                    | 6.2 (14.1)  | 197                                   | 3.9 (5.9)   |
| Psoriasis body surface area (0-100%)       | NA                                    | NA          | 106                                   | 1.9 (6.3)   | NA                                    | NA          | 90                                    | 2.0 (6.7)   | NA                                    | NA          | 123                                   | 1.8 (5.9)   |
| Tender joint count (0-68)                  | 49                                    | 1.0 (2.1)   | 142                                   | 1.2 (2.5)   | 42                                    | 0.5 (0.9)   | 97                                    | 1.4 (2.9)   | 43                                    | 0.6 (1.5)   | 138                                   | 1.2 (2.5)   |
| Swollen joint count (0-66)                 | 49                                    | 0.3 (0.7)   | 142                                   | 0.5 (1.0)   | 42                                    | 0.2 (0.6)   | 97                                    | 0.3 (1.0)   | 43                                    | 0.4 (1.2)   | 138                                   | 0.4 (1.0)   |
| LEI score                                  | 47                                    | 0.2 (0.7)   | 114                                   | 0.0 (0.2)   | 42                                    | 0.1 (0.3)   | 97                                    | 0.0 (0.2)   | 64                                    | 0.1 (0.4)   | 137                                   | 0.0 (0.2)   |
| Dactylitis (0-20)                          | 47                                    | 0.0 (0.0)   | 114                                   | 0.1 (0.3)   | 42                                    | 0.0 (0.0)   | 97                                    | 0.0 (0.3)   | 64                                    | 0.0 (0.0)   | 137                                   | 0.1 (0.3)   |
| <b>Physical function and health impact</b> |                                       |             |                                       |             |                                       |             |                                       |             |                                       |             |                                       |             |
| HAQ-S (0-3)                                | 36                                    | 0.9 (0.6)   | 92                                    | 0.8 (0.7)   | 33                                    | 0.9 (0.6)   | 73                                    | 0.7 (0.7)   | 48                                    | 0.9 (0.6)   | 146                                   | 0.7 (0.6)   |
| ASAS-HI (0-17)                             | 43                                    | 6.1 (3.9)   | 104                                   | 5.0 (3.4)   | 39                                    | 5.9 (4.0)   | 88                                    | 4.9 (3.4)   | 57                                    | 6.3 (3.9)   | 162                                   | 4.9 (3.3)   |
| <b>Health-related quality of life</b>      |                                       |             |                                       |             |                                       |             |                                       |             |                                       |             |                                       |             |
| EQ-5D (0-1)                                | 38                                    | 0.74 (0.21) | 92                                    | 0.78 (0.18) | 33                                    | 0.76 (0.22) | 73                                    | 0.8 (0.2)   | 49                                    | 0.74 (0.23) | 145                                   | 0.79 (0.17) |
| SF36 MCS (0-100)                           | 43                                    | 48.2 (12.1) | 112                                   | 50.0 (10.4) | 42                                    | 48.4 (11.2) | 97                                    | 49.7 (10.8) | 57                                    | 47.2 (11.9) | 171                                   | 50.3 (10.4) |
| SF36 PCS (0-100)                           | 43                                    | 38.2 (9.3)  | 112                                   | 40.4 (10.8) | 42                                    | 39.2 (10.3) | 97                                    | 41.3 (10.8) | 57                                    | 38.3 (9.9)  | 171                                   | 40.6 (10.1) |

Values are presented as mean (SD) unless stated otherwise.

DAPSA = Disease Activity Psoriatic Arthritis Score, PASDAS = Psoriatic Arthritis Disease Activity Score, ASDAS = Ankylosing Spondylitis Disease Activity Score, NSAID = Non-Steroidal Anti Inflammatory Drug, cDMARD = conventional Disease Modifying Anti-Rheumatic Drug, bDMARD = biological Disease Modifying Anti-Rheumatic Drug, BASDAI = Bath Ankylosing Spondylitis Disease Activity Index, PGA = Patient Global Assessment, VAS = Visual Analog Scale, PhGA = Physician Global Assessment, CRP = C-

---

Reactive Protein, LEI score = Leeds Enthesitis Index score, HAQ-S = Health Assessment Questionnaire for Spondyloarthritis, ASAS-HI = Assessment of SpondyloArthritis international Society Health Index, EQ-5D = EuroQol 5D, SF36 = Medical Outcomes Study 36-Question Short Form, MCS = Mental Component Score, PCS = Physical Component Score, SpA = Spondyloarthritis, NA = not applicable

---

**Supplementary Table 2. Clinical and demographic characteristics of patients with axial SpA.**

| Variable                                   | Axial SpA ASDAS (n= 249)              |             |
|--------------------------------------------|---------------------------------------|-------------|
|                                            | Patients with an available assessment | Value       |
| Age, years                                 | 249                                   | 48.1 (13.3) |
| Female, n (%)                              | 249                                   | 100 (40.2%) |
| Symptom duration, years                    | 177                                   | 20.4 (13.5) |
| Current NSAID use, n (%)                   | -                                     | 159 (63.9%) |
| Current cDMARD use, n (%)                  | -                                     | 29 (11.6%)  |
| Current bDMARD use, n (%)                  | -                                     | 137 (55.0%) |
| Current glucocorticoid use, n (%)          | -                                     | 1 (0.4%)    |
| <b>Disease activity</b>                    |                                       |             |
| DAPSA (0-∞)                                | 112                                   | 8.5 (5.2)   |
| PASDAS (0-10)                              | 94                                    | 3.3 (1.1)   |
| ASDAS (0-∞)                                | 249                                   | 2.3 (0.9)   |
| BASDAI (0-10)                              | 249                                   | 4.1 (2.2)   |
| PGA (0-10)                                 | 249                                   | 4.2 (2.6)   |
| VAS pain (0-10)                            | 173                                   | 4.1 (2.5)   |
| PhGA (0-10)                                | 154                                   | 1.9 (1.5)   |
| CRP, mg/L (0-∞)                            | 249                                   | 4.8 (8.0)   |
| Psoriasis body surface area (0-100%)       | 112                                   | 0.3 (1.1)   |
| Tender joint count (0-68)                  | 156                                   | 0.3 (0.8)   |
| Swollen joint count (0-66)                 | 156                                   | 0.1 (0.4)   |
| LEI score (0-6)                            | 188                                   | 0.2 (0.5)   |
| Dactylitis count (0-20)                    | 188                                   | 0.0 (0.1)   |
| <b>Physical function and health impact</b> |                                       |             |
| HAQ-S (0-3)                                | 145                                   | 0.7 (0.5)   |
| ASAS-HI (0-17)                             | 151                                   | 5.5 (3.6)   |
| <b>Health-related quality of life</b>      |                                       |             |
| EQ-5D (0-1)                                | 142                                   | 0.78 (0.20) |
| SF36 MCS (0-100)                           | 161                                   | 49.6 (11.9) |
| SF36 PCS (0-100)                           | 161                                   | 41.1 (9.2)  |

Values are presented as mean (SD) unless stated otherwise.

DAPSA = Disease Activity Psoriatic Arthritis Score, PASDAS = Psoriatic Arthritis Disease Activity Score, ASDAS = Ankylosing Spondylitis Disease Activity Score, NSAID = Non-Steroidal Anti Inflammatory Drug, cDMARD = conventional Disease Modifying Anti-Rheumatic Drug, bDMARD = biological Disease Modifying Anti-Rheumatic Drug, BASDAI = Bath Ankylosing Spondylitis Disease Activity Index, PGA = Patient Global Assessment, VAS = Visual Analog Scale, PhGA = Physician Global Assessment, CRP = C-Reactive Protein, LEI score = Leeds Enthesitis Index score, HAQ-S = Health Assessment Questionnaire for Spondyloarthritis, ASAS-HI = Assessment of SpondyloArthritis international Society Health Index, EQ-5D = EuroQol 5D, SF36 = Medical Outcomes Study 36-Question Short Form, MCS = Mental Component Score, PCS = Physical Component Score, SpA = Spondyloarthritis, NA = not applicable

**Supplementary Table 3. A priori hypothesized correlations between DAPSA, PASDAS and ASDAS with outcome measures.**

| Outcome measure                            | DAPSA                 |                        |                     | PASDAS                |                        |                     | ASDAS                 |                        |                     |                        |
|--------------------------------------------|-----------------------|------------------------|---------------------|-----------------------|------------------------|---------------------|-----------------------|------------------------|---------------------|------------------------|
|                                            | Total pSpA population | Peripheral SpA         |                     | Total pSpA population | Peripheral SpA         |                     | Total pSpA population | Peripheral SpA         |                     | Axial SpA              |
| Disease activity                           |                       | PSpA without psoriasis | PSpA with psoriasis |                       | PSpA without psoriasis | PSpA with psoriasis |                       | pSpA without psoriasis | pSpA with psoriasis | Total axSpA population |
| DAPSA†                                     |                       |                        |                     | High                  | High                   | High                | High                  | High                   | High                |                        |
| PASDAS§                                    | High                  | High                   | High                |                       |                        |                     | High                  | High                   | High                |                        |
| ASDAS‡                                     | High                  | High                   | High                | High                  | High                   | High                |                       |                        |                     |                        |
| BASDAI‡                                    | High                  | High                   | High                | High                  | High                   | High                |                       |                        |                     |                        |
| PGA†, §, ‡                                 |                       |                        |                     |                       |                        |                     |                       |                        |                     |                        |
| VAS pain†                                  |                       |                        |                     | High                  | High                   | High                | High                  | High                   | High                | High                   |
| PhGA§                                      | Moderate              | Moderate               | Moderate            |                       |                        |                     | Moderate - High       | Moderate - High        | Moderate - High     | High                   |
| Psoriasis BSA                              |                       |                        | Low                 |                       |                        | Low                 |                       |                        | Low                 | Low                    |
| TJC68†, §                                  |                       |                        |                     |                       |                        |                     | Very low - Low        | Very low - Low         | Very low - Low      | Very low - Low         |
| SJC66†, §                                  |                       |                        |                     |                       |                        |                     | Very low - Low        | Very low - Low         | Very low - Low      | Very low - Low         |
| LEI score§                                 | Very low - Low        | Very low - Low         | Very low - Low      |                       |                        |                     | Very low - Low        | Very low - Low         | Very low - Low      | Very low - Low         |
| Dactylitis count§                          | Very low              | Very low               | Very low            |                       |                        |                     | Very low              | Very low               | Very low            | Very low               |
| <b>Physical function and health impact</b> |                       |                        |                     |                       |                        |                     |                       |                        |                     |                        |
| HAQ-S                                      | Moderate              | Moderate               | Moderate            | Moderate              | Moderate               | Moderate            | Moderate              | Moderate               | Moderate            | Moderate               |
| ASAS-HI                                    | Low - Moderate        | Low - Moderate         | Low - Moderate      | Low - Moderate        | Low - Moderate         | Low - Moderate      | Low - Moderate        | Low - Moderate         | Low - Moderate      | Low - Moderate         |
| <b>Health-related quality of life</b>      |                       |                        |                     |                       |                        |                     |                       |                        |                     |                        |
| EQ-5D                                      | Low - Moderate        | Low - Moderate         | Low - Moderate      | Low - Moderate        | Low - Moderate         | Low - Moderate      | Low - Moderate        | Low - Moderate         | Low - Moderate      | Low - Moderate         |
| SF36 MCS                                   | Low                   | Low                    | Low                 | Low                   | Low                    | Low                 | Low                   | Low                    | Low                 | Low                    |
| SF36 PCS§                                  | Moderate              | Moderate               | Moderate            |                       |                        |                     | Moderate              | Moderate               | Moderate            | Moderate               |

† DAPSA components, § PASDAS components, ‡ ASDAS components, Individual components of the DAPSA, PASDAS and ASDAS were not included in the calculation of the frequency of confirmed hypotheses for concurrent validity  
DAPSA = Disease Activity Psoriatic Arthritis Score, PASDAS = Psoriatic Arthritis Disease Activity Score, ASDAS = Ankylosing Spondylitis Disease Activity Score, BASDAI = Bath Ankylosing Spondylitis Disease Activity Index, PGA = Patient Global Assessment, VAS= Visual Analog Scale, PhGA = Physician Global Assessment, CRP = C-Reactive Protein, LEI score = Leeds Enthesitis Index score, BSA = Body Surface Area, TJC68 = Tender Joint Count of 68 joints, SJC = Swollen Joint Count of 66 joints, HAQ-S = Health Assessment Questionnaire for Spondyloarthritis, ASAS-HI = Assessment of SpondyloArthritis international Society Health Index, EQ-5D = EuroQol 5D, SF36 = Medical Outcomes Study 36-Question Short Form, MCS = Mental Component Score, PCS = Physical Component Score, SpA = Spondyloarthritis, pSpA = peripheral Spondyloarthritis, axSpA = Axial Spondyloarthritis

Supplementary Table 4. Spearman correlations of the disease activity measures with outcomes measures in patients with simultaneously available DAPSA, PASDAS and ASDAS scores .

| Outcome measure                            | DAPSA                       |            |                             |            |                          |            | PASDAS                      |            |                             |            |                          |            | ASDAS                       |            |                             |            |                          |            |  |
|--------------------------------------------|-----------------------------|------------|-----------------------------|------------|--------------------------|------------|-----------------------------|------------|-----------------------------|------------|--------------------------|------------|-----------------------------|------------|-----------------------------|------------|--------------------------|------------|--|
|                                            | Total pSpA population n=124 |            | pSpA without psoriasis n=39 |            | pSpA with psoriasis n=92 |            | Total pSpA population n=124 |            | pSpA without psoriasis n=39 |            | pSpA with psoriasis n=92 |            | Total pSpA population n=124 |            | pSpA without psoriasis n=39 |            | pSpA with psoriasis n=92 |            |  |
|                                            | R <sub>s</sub>              | Hypothesis | R <sub>s</sub>              | Hypothesis | R <sub>s</sub>           | Hypothesis | R <sub>s</sub>              | Hypothesis | R <sub>s</sub>              | Hypothesis | R <sub>s</sub>           | Hypothesis | R <sub>s</sub>              | Hypothesis | R <sub>s</sub>              | Hypothesis | R <sub>s</sub>           | Hypothesis |  |
| <b>Disease activity</b>                    |                             |            |                             |            |                          |            |                             |            |                             |            |                          |            |                             |            |                             |            |                          |            |  |
| DAPSA                                      | NA                          |            | NA                          |            | NA                       |            | 0.90*                       | - H        | 0.85*                       | +          | 0.90*                    | - H        | 0.78*                       | +          | 0.77*                       | +          | 0.76*                    | +          |  |
| PASDAS§                                    | 0.90*                       | - H        | 0.85*                       | +          | 0.90*                    | - H        | NA                          |            | NA                          |            | NA                       |            | 0.85*                       | +          | 0.83*                       | +          | 0.84*                    | +          |  |
| ASDAS                                      | 0.78*                       | +          | 0.77*                       | +          | 0.76*                    | +          | 0.85*                       | +          | 0.83*                       | +          | 0.84*                    | +          | NA                          |            | NA                          |            | NA                       |            |  |
| BASDAI‡                                    | 0.77*                       | +          | 0.71*                       | +          | 0.77*                    | +          | 0.79*                       | +          | 0.67*                       | - L        | 0.80*                    | +          | 0.86*                       |            | 0.82*                       |            | 0.86*                    |            |  |
| PGA‡, § †                                  | 0.89*                       |            | 0.89*                       |            | 0.87*                    |            | 0.91*                       |            | 0.87*                       |            | 0.91*                    |            | 0.83*                       |            | 0.75*                       |            | 0.82*                    |            |  |
| VAS pain†                                  | 0.88*                       |            | 0.94*                       |            | 0.87*                    | +          | 0.73*                       | +          | 0.71*                       | +          | 0.72*                    | +          | 0.66*                       | - L        | 0.68*                       | +          | 0.62*                    | +          |  |
| PhGA§                                      | 0.65*                       | +          | 0.54*                       | +          | 0.68*                    |            | 0.80*                       |            | 0.72*                       |            | 0.81*                    |            | 0.53*                       | +          | 0.41*                       | - L        | 0.56*                    | - L        |  |
| CRP‡ † §                                   | 0.11                        |            | 0.27                        |            | 0.02                     |            | 0.19*                       |            | 0.36*                       |            | 0.11                     |            | 0.42*                       |            | 0.55*                       |            | 0.37*                    |            |  |
| Psoriasis BSA                              | NA                          |            | NA                          |            | -0.00                    | - L        | NA                          |            | NA                          |            | -0.01                    | - L        | NA                          |            | NA                          |            | -0.01                    | - L        |  |
| TJC68† §                                   | 0.66*                       |            | 0.67*                       |            | 0.67*                    |            | 0.55*                       |            | 0.52*                       |            | 0.59*                    |            | 0.39*                       | +          | 0.33                        | +          | 0.44*                    | +          |  |
| SJC66† §                                   | 0.51*                       |            | 0.36                        |            | 0.52*                    |            | 0.46*                       |            | 0.28                        |            | 0.53*                    |            | 0.23*                       | +          | 0.09                        | +          | 0.32*                    | +          |  |
| LEI score §                                | 0.02                        | +          | 0.08                        | +          | -0.03                    | +          | 0.10                        |            | 0.19                        |            | 0.05                     |            | -0.00                       | +          | 0.04                        | +          | -0.08                    | +          |  |
| Dactylitis count§                          | 0.19*                       | +          | ND                          |            | 0.22*                    | +          | 0.20                        |            | ND                          |            | 0.25*                    |            | 0.17                        | +          | ND                          |            | 0.21                     | +          |  |
| <b>Physical function and health impact</b> |                             |            |                             |            |                          |            |                             |            |                             |            |                          |            |                             |            |                             |            |                          |            |  |
| HAQ-S                                      | 0.63*                       | +          | 0.80*                       | +          | 0.57*                    | +          | 0.68*                       | +          | 0.71*                       | - H        | 0.67*                    | +          | 0.70*                       | - H        | 0.75*                       | - H        | 0.68*                    | +          |  |
| ASAS-HI                                    | 0.69*                       | +          | 0.69*                       | +          | 0.67*                    | +          | 0.70*                       | - H        | 0.61*                       | +          | 0.69*                    | +          | 0.71*                       | - H        | 0.73*                       | - H        | 0.69*                    | +          |  |
| <b>Health-related quality of life</b>      |                             |            |                             |            |                          |            |                             |            |                             |            |                          |            |                             |            |                             |            |                          |            |  |
| EQ-5D                                      | -0.50*                      | +          | -0.51*                      | +          | -0.48*                   | +          | -0.50*                      | +          | -0.40*                      | +          | -0.54*                   | +          | -0.57*                      | +          | -0.59*                      | +          | -0.55*                   | +          |  |
| SF36 MCS                                   | -0.23*                      | - L        | -0.32*                      | +          | -0.19*                   | - L        | -0.18*                      | - L        | -0.32*                      | +          | -0.15                    | - L        | -0.28*                      | - L        | -0.50*                      | +          | -0.19*                   | - L        |  |
| SF36 PCS§                                  | -0.69*                      | +          | -0.75*                      | +          | -0.66*                   | +          | -0.78*                      |            | -0.80*                      |            | -0.76*                   |            | -0.73*                      | - H        | -0.80*                      | - H        | -0.70*                   | - H        |  |

† DAPSA components, § PASDAS components, ‡ ASDAS components Individual components of the DAPSA, PASDAS and ASDAS were not included in the calculation of the frequency of confirmed hypotheses for concurrent validity

ND = Correlation could not be calculated as the standard deviation was zero, \*Correlation is statistically significant at the 0.05 level (two-tailed), + = strength of correlation as hypothesized, L = strength of correlation is lower than hypothesized, H = strength of correlation is higher than hypothesized,

---

DAPSA = Disease Activity Psoriatic Arthritis Score, PASDAS = Psoriatic Arthritis Disease Activity Score, ASDAS = Ankylosing Spondylitis Disease Activity Score, BASDAI = Bath Ankylosing Spondylitis Disease Activity Index, PGA = Patient Global Assessment, VAS= Visual Analog Scale, PhGA = Physician Global Assessment, CRP = C-Reactive Protein, LEI score = Leeds Enthesitis Index score, BSA = Body Surface Area, TJC68 = Tender Joint Count of 68 joints, SJC = Swollen Joint Count of 66 joints, HAQ-S = Health Assessment Questionnaire for Spondyloarthritis, ASAS-HI = Assessment of SpondyloArthritis international Society Health Index, EQ-5D = EuroQol 5D, SF36 = Medical Outcomes Study 36-Question Short Form, MCS = Mental Component Score, PCS = Physical Component Score, SpA = Spondyloarthritis, pSpA = peripheral Spondyloarthritis, axSpA = Axial Spondyloarthritis,

---

Supplementary Table 5. Outcome measures stratified for disease activity states in patients with simultaneously available DAPSA, PASDAS and ASDAS scores.

| Outcome measure                            | DAPSA<br>Total pSpA population<br>n = 124 |                               |                                |                        | PASDAS<br>Total pSpA population<br>n = 124 |         |                           |                                  |                                  |                         | ASDAS<br>Total pSpA population<br>n = 124 |         |                           |                                  |                                  |                           |               |         |
|--------------------------------------------|-------------------------------------------|-------------------------------|--------------------------------|------------------------|--------------------------------------------|---------|---------------------------|----------------------------------|----------------------------------|-------------------------|-------------------------------------------|---------|---------------------------|----------------------------------|----------------------------------|---------------------------|---------------|---------|
|                                            | DAPSA cut-offs                            |                               |                                |                        | One-way ANOVA                              |         | PASDAS cut-offs           |                                  |                                  |                         | One-way ANOVA                             |         | ASDAS cut-offs            |                                  |                                  |                           | One-way ANOVA |         |
|                                            | ≤4<br>n = 33<br>(26.6%)                   | 5 to ≤14<br>n = 64<br>(51.6%) | 15 to ≤28<br>n = 26<br>(21.0%) | ≥29<br>n = 1<br>(0.8%) | F-value                                    | P-value | ≤1.9<br>n = 18<br>(14.5%) | 1.9 to <3.2<br>n = 36<br>(29.0%) | 3.2 to <5.4<br>n = 65<br>(52.4%) | ≥5.4<br>n = 5<br>(4.0%) | F-value                                   | P-value | <1.3<br>n = 30<br>(24.2%) | 1.3 to <2.1<br>n = 34<br>(27.4%) | 2.1 to ≤3.5<br>n = 46<br>(37.1%) | >3.5<br>n = 14<br>(11.3%) | F-value       | P-value |
| DAPSA (0-∞)                                | 2.2 (1.4)                                 | 9.4 (2.9)                     | 19.1 (3.7)                     | 29.2 (-)               | 197.1                                      | <0.01   | 1.7 (2.0)                 | 5.4 (2.7)                        | 13.3 (5.2)                       | 22.1 (3.6)              | 66.0                                      | <0.01   | 3.2 (3.0)                 | 7.2 (4.8)                        | 13.5 (5.6)                       | 16.9 (4.2)                | 43.1          | <0.01   |
| PASDAS (0-10)                              | 1.8 (0.9)                                 | 3.5 (0.8)                     | 5.0 (0.6)                      | 3.3 (-)                | 86.6                                       | <0.01   | 1.0 (0.5)                 | 2.7 (0.4)                        | 4.2 (0.6)                        | 5.9 (0.4)               | 259.6                                     | <0.01   | 1.8 (0.9)                 | 3.0 (1.0)                        | 4.2 (0.7)                        | 4.8 (0.6)                 | 65.9          | <0.01   |
| ASDAS (0-∞)                                | 1.1 (0.5)                                 | 2.2 (0.7)                     | 3.1 (0.8)                      | 2.2 (-)                | 43.1                                       | <0.01   | 0.9 (0.4)                 | 1.5 (0.6)                        | 2.7 (0.7)                        | 3.2 (0.9)               | 61.3                                      | <0.01   | 0.9 (0.3)                 | 1.7 (0.2)                        | 2.7 (0.3)                        | 3.8 (0.3)                 | 423.7         | <0.01   |
| BASDAI (0-10)                              | 1.6 (1.5)                                 | 4.5 (1.8)                     | 6.2 (1.9)                      | 6.0 (-)                | 36.9                                       | <0.01   | 1.0 (0.8)                 | 2.8 (1.6)                        | 5.5 (1.7)                        | 7.0 (1.8)               | 53.1                                      | <0.01   | 1.4 (1.0)                 | 3.2 (1.4)                        | 5.8 (1.3)                        | 6.8 (1.6)                 | 93.1          | <0.01   |
| PGA (0-10)                                 | 1.1 (1.0)                                 | 4.1 (1.8)                     | 7.3 (1.6)                      | 4.0 (-)                | 74.5                                       | <0.01   | 0.4 (0.7)                 | 2.1 (1.0)                        | 5.6 (1.7)                        | 8.6 (1.1)               | 101.1                                     | <0.01   | 1.1 (1.1)                 | 2.9 (1.9)                        | 5.6 (1.7)                        | 7.1 (1.5)                 | 71.8          | <0.01   |
| VAS pain (0-10)                            | 0.7 (0.7)                                 | 4.2 (1.8)                     | 6.5 (1.5)                      | 5.0 (-)                | 75.2                                       | <0.01   | 0.9 (2.0)                 | 2.6 (2.2)                        | 4.9 (1.8)                        | 7.4 (0.8)               | 30.8                                      | <0.01   | 1.7 (2.3)                 | 2.9 (2.2)                        | 5.0 (1.8)                        | 6.1 (1.4)                 | 25.1          | <0.01   |
| PhGA (0-10)                                | 1.0 (0.9)                                 | 1.8 (1.0)                     | 3.5 (1.3)                      | 1.0 (-)                | 29.9                                       | <0.01   | 0.3 (0.4)                 | 1.5 (0.9)                        | 2.4 (1.0)                        | 5.2 (1.8)               | 49.1                                      | <0.01   | 1.0 (1.1)                 | 1.6 (1.0)                        | 2.4 (1.2)                        | 3.0 (1.8)                 | 12.5          | <0.05   |
| CRP, mg/L (0-∞)                            | 2.5 (2.3)                                 | 3.4 (3.6)                     | 7.5 (9.7)                      | 2.0 (-)                | 5.0                                        | <0.01   | 2.9 (2.9)                 | 2.0 (1.5)                        | 5.2 (7.0)                        | 5.4 (6.2)               | 3.1                                       | <0.05   | 1.8 (1.2)                 | 2.5 (2.5)                        | 4.0 (5.2)                        | 11.8 (9.8)                | 15.6          | <0.01   |
| TJC68 (0-68)                               | 0.1 (0.3)                                 | 0.6 (1.0)                     | 3.2 (3.1)                      | 20.0 (-)               | 68.8                                       | <0.01   | 0.0 (0.0)                 | 0.3 (0.6)                        | 1.8 (3.3)                        | 3.6 (1.1)               | 6.0                                       | <0.01   | 0.2 (0.6)                 | 0.7 (1.2)                        | 2.0 (3.8)                        | 1.7 (2.0)                 | 3.8           | <0.05   |
| SJC66 (0-66)                               | 0.1 (0.3)                                 | 0.1 (0.3)                     | 1.4 (1.6)                      | 0.0 (-)                | 19.0                                       | <0.01   | 0.0 (0.0)                 | 0.2 (0.4)                        | 0.5 (1.0)                        | 2.0 (2.0)               | 7.9                                       | <0.01   | 0.1 (0.4)                 | 0.4 (0.8)                        | 0.4 (1.1)                        | 0.7 (1.4)                 | 1.6           | 0.20    |
| LEI score (0-6)                            | 0.0 (0.2)                                 | 0.1 (0.2)                     | 0.0 (0.2)                      | 0.0 (-)                | 0.2                                        | 0.90    | 0.0 (0.0)                 | 0.1 (0.2)                        | 0.1 (0.2)                        | 0.2 (0.4)               | 1.1                                       | 0.33    | 0.0 (0.2)                 | 0.1 (0.2)                        | 0.1 (0.3)                        | 0.0 (0.0)                 | 0.4           | 0.75    |
| Dactylitis (0-20)                          | 0.0 (0.0)                                 | 0.0 (0.0)                     | 0.2 (0.6)                      | 0.0 (-)                | 2.1                                        | 0.11    | 0.0 (0.0)                 | 0.0 (0.0)                        | 0.1 (0.4)                        | 0.2 (0.4)               | 0.9                                       | 0.46    | 0.0 (0.0)                 | 0.0 (0.0)                        | 0.1 (0.4)                        | 0.1 (0.3)                 | 0.6           | 0.64    |
| <b>Physical function and health impact</b> |                                           |                               |                                |                        |                                            |         |                           |                                  |                                  |                         |                                           |         |                           |                                  |                                  |                           |               |         |
| HAQ-S (0-3)                                | 0.2 (0.2)                                 | 1.0 (0.5)                     | 1.3 (0.8)                      | 0.9 (-)                | 20.0                                       | <0.01   | 0.1 (0.15)                | 0.5 (0.4)                        | 1.2 (0.6)                        | 1.9 (0.6)               | 27.0                                      | <0.01   | 0.2 (0.3)                 | 0.7 (0.6)                        | 1.2 (0.5)                        | 1.4 (0.7)                 | 22.4          | <0.01   |
| ASAS-HI (0-17)                             | 1.7 (1.7)                                 | 6.0 (3.1)                     | 7.7 (3.5)                      | 10.0 (-)               | 25.0                                       | <0.01   | 1.5 (1.9)                 | 3.2 (2.0)                        | 7.2 (3.3)                        | 8.2 (3.2)               | 30.4                                      | <0.01   | 2.0 (1.7)                 | 3.9 (2.6)                        | 7.3 (3.0)                        | 8.7 (3.5)                 | 32.8          | <0.01   |
| <b>Health-related quality of life</b>      |                                           |                               |                                |                        |                                            |         |                           |                                  |                                  |                         |                                           |         |                           |                                  |                                  |                           |               |         |
| EQ-5D (0-1)                                | 0.91 (0.11)                               | 0.76 (0.14)                   | 0.63 (0.31)                    | 0.81 (-)               | 9.3                                        | <0.01   | 0.92 (0.13)               | 0.85 (0.11)                      | 0.69 (0.2)                       | 0.87 (0.11)             | 8.2                                       | <0.01   | 0.91 (0.09)               | 0.82 (0.16)                      | 0.71 (0.21)                      | 0.60 (0.29)               | 10.2          | <0.01   |
| SF36 MCS (0-100)                           | 54.9 (7.2)                                | 46.2 (11.1)                   | 48.6 (12.0)                    | 48.6 (-)               | 4.3                                        | <0.01   | 56.3 (6.2)                | 49.8 (9.7)                       | 47.0 (11.6)                      | 53.1 (12.2)             | 3.9                                       | <0.05   | 53.1 (8.1)                | 52.2 (11.4)                      | 45.6 (10.6)                      | 47.5 (11.8)               | 4.3           | <0.01   |
| SF36 PCS (0-100)                           | 51.0 (5.6)                                | 38.4 (8.5)                    | 31.9 (9.1)                     | 43.1 (-)               | 30.6                                       | <0.01   | 52.5 (4.8)                | 46.2 (7.6)                       | 35.2 (7.4)                       | 22.9 (9.5)              | 45.6                                      | <0.01   | 50.8 (6.1)                | 42.8 (9.6)                       | 34.7 (7.9)                       | 31.2 (5.4)                | 33.8          | <0.01   |

Values are presented as mean (SD) unless stated otherwise. Included number of patients might be lower due to missing outcome measures. Correlation is statistically significant at the 0.05 level (two-tailed)

DAPSA = Disease Activity Psoriatic Arthritis Score, PASDAS = Psoriatic Arthritis Disease Activity Score, ASDAS = Ankylosing Spondylitis Disease Activity Score, BASDAI = Bath Ankylosing Spondylitis Disease Activity Index, PGA = Patient Global Assessment, VAS = Visual Analog Scale, PhGA = Physician Global Assessment, CRP = C-Reactive Protein, BSA = Body Surface Area, LEI score = Leeds Enthesitis Index score, TJC68 = Tender Joint Count of 68 joints, SJC66 = Swollen Joint Count of 66 joints, HAQ-S = Health Assessment Questionnaire for Spondyloarthritis, ASAS-HI = Assessment of SpondyloArthritis international Society Health Index, EQ-5D = EuroQol 5D, SF36 = Medical Outcomes Study 36-Question Short Form, MCS = Mental Component Score, PCS = Physical Component Score, pSpA = peripheral Spondyloarthritis

Supplementary Table 6. Outcome measures stratified for DAPSA disease activity states for peripheral SpA with and without psoriasis.

| Outcome measure                            | DAPSA<br>Peripheral SpA with psoriasis<br>n = 142 |                               |                                |                        |               |         | DAPSA<br>Peripheral SpA without psoriasis<br>n = 49 |                               |                                |                        |               |         |
|--------------------------------------------|---------------------------------------------------|-------------------------------|--------------------------------|------------------------|---------------|---------|-----------------------------------------------------|-------------------------------|--------------------------------|------------------------|---------------|---------|
|                                            | DAPSA cut-offs                                    |                               |                                |                        | One-way ANOVA |         | DAPSA cut-offs                                      |                               |                                |                        | One-way ANOVA |         |
|                                            | ≤4<br>n = 38<br>(26.8%)                           | 5 to ≤14<br>n = 74<br>(52.1%) | 15 to ≤28<br>n = 28<br>(19.7%) | ≥29<br>n = 2<br>(1.4%) | F-value       | P-value | ≤4<br>n = 11<br>(22.4%)                             | 5 to ≤14<br>n = 25<br>(51.0%) | 15 to ≤28<br>n = 13<br>(26.5%) | ≥29<br>n = 0<br>(0.0%) | F-value       | P-value |
| DAPSA (0-∞)                                | 2.1 (1.3)                                         | 9.2 (3.0)                     | 19.0 (2.9)                     | 34.7 (7.8)             | 266.1         | <0.01   | 2.0 (1.5)                                           | 10.2 (2.6)                    | 18.6 (3.4)                     | - (-)                  | 116.8         | <0.01   |
| PASDAS (0-10)                              | 1.8 (0.7)                                         | 3.2 (0.8)                     | 4.9 (0.6)                      | - (-)                  | 88.0          | <0.01   | 1.6 (1.2)                                           | 3.8 (0.4)                     | 5.1 (0.7)                      |                        | 51.0          | <0.01   |
| ASDAS (0-∞)                                | 1.1 (0.4)                                         | 2.1 (0.7)                     | 3.3 (0.9)                      | 3.2 (-)                | 46.7          | <0.01   | 1.0 (0.6)                                           | 2.5 (0.7)                     | 3.2 (0.8)                      | - (-)                  | 29.7          | <0.01   |
| BASDAI (0-10)                              | 1.8 (1.5)                                         | 4.3 (1.8)                     | 6.2 (1.9)                      | 7.6 (-)                | 32.8          | <0.01   | 1.5 (1.8)                                           | 5.3 (1.8)                     | 6.3 (1.9)                      | - (-)                  | 20.4          | <0.01   |
| PGA (0-10)                                 | 1.1 (0.9)                                         | 3.8 (1.9)                     | 7.1 (1.6)                      | 7.5 (0.7)              | 76.1          | <0.01   | 0.8 (1.0)                                           | 4.7 (1.4)                     | 7.5 (1.6)                      | - (-)                  | 72.3          | <0.01   |
| VAS pain (0-10)                            | 0.7 (0.7)                                         | 4.0 (1.9)                     | 6.9 (1.4)                      | 6.3 (1.0)              | 89.5          | <0.01   | 0.8 (0.6)                                           | 4.6 (1.7)                     | 6.4 (1.4)                      | - (-)                  | 44.9          | <0.01   |
| PhGA (0-10)                                | 0.8 (0.9)                                         | 1.5 (1.0)                     | 3.0 (1.6)                      | 8.0 (-)                | 25.4          | <0.01   | 0.8 (1.0)                                           | 1.7 (1.1)                     | 3.7 (1.3)                      | - (-)                  | 15.0          | <0.01   |
| CRP, mg/L (0-∞)                            | 2.3 (1.8)                                         | 3.8 (4.1)                     | 8.0 (10.7)                     | 13.5 (16.3)            | 6.9           | <0.01   | 2.3 (3.0)                                           | 4.6 (4.3)                     | 6.6 (7.7)                      | - (-)                  | 2.1           | 0.14    |
| Psoriasis BSA (0-100%)                     | 1.1 (1.9)                                         | 2.6 (8.6)                     | 1.4 (3.2)                      | - (-)                  | 0.63          | 0.54    | NA                                                  | NA                            | NA                             | NA                     | NA            | NA      |
| TJC68 (0-68)                               | 0.1 (0.3)                                         | 0.7 (1.2)                     | 3.1 (2.1)                      | 15.5 (9.2)             | 86.7          | <0.01   | 0.0 (0.0)                                           | 0.3 (0.6)                     | 3.2 (3.1)                      | - (-)                  | 15.0          | <0.01   |
| SJC66 (0-66)                               | 0.0 (0.0)                                         | 0.3 (0.7)                     | 1.2 (1.4)                      | 4.0 (1.4)              | 24.2          | <0.01   | 0.2 (0.6)                                           | 0.1 (0.3)                     | 0.9 (1.1)                      | - (-)                  | 5.7           | <0.01   |
| LEI score (0-6)                            | 0.0 (0.0)                                         | 0.1 (0.3)                     | 0.1 (0.2)                      | 0.0 (-)                | 0.8           | 0.48    | 0.0 (0.0)                                           | 0.2 (0.5)                     | 0.4 (1.2)                      | - (-)                  | 1.1           | 0.34    |
| Dactylitis count (0-20)                    | 0.0 (0.0)                                         | 0.0 (0.1)                     | 0.2 (0.7)                      | 0.0 (-)                | 2.8           | <0.05   | 0.0 (0.0)                                           | 0.0 (0.0)                     | 0.0 (0.0)                      | - (-)                  | -             | =       |
| <b>Physical function and health impact</b> |                                                   |                               |                                |                        |               |         |                                                     |                               |                                |                        |               |         |
| HAQ-S (0-3)                                | 0.2 (0.3)                                         | 0.9 (0.6)                     | 1.2 (0.8)                      | 1.0 (-)                | 11.4          | <0.01   | 0.1 (0.2)                                           | 1.1 (0.4)                     | 1.1 (0.6)                      | - (-)                  | 16.5          | <0.01   |
| ASAS-HI (0-17)                             | 1.9 (1.7)                                         | 5.3 (2.9)                     | 7.6 (3.1)                      | 11.0 (-)               | 22.0          | <0.01   | 1.5 (1.6)                                           | 7.5 (3.0)                     | 7.3 (3.8)                      | - (-)                  | 15.1          | <0.01   |
| <b>Health-related quality of life</b>      |                                                   |                               |                                |                        |               |         |                                                     |                               |                                |                        |               |         |
| EQ-5D (0-1)                                | 0.94 (0.07)                                       | 0.78 (0.10)                   | 0.64 (0.22)                    | 0.41 (-)               | 22.3          | <0.01   | 0.94 (0.05)                                         | 0.71 (0.14)                   | 0.63 (0.28)                    | - (-)                  | 7.6           | <0.01   |
| SF36 MCS (0-100)                           | 55.2 (7.7)                                        | 48.4 (10.2)                   | 48.5 (10.7)                    | 22.1 (-)               | 6.3           | <0.01   | 56.2 (4.9)                                          | 45.4 (12.6)                   | 46.3 (13.3)                    | - (-)                  | 3.2           | 0.05    |
| SF36 PCS (0-100)                           | 49.7 (7.3)                                        | 39.2 (9.7)                    | 32.3 (8.6)                     | 35.9 (-)               | 18.7          | <0.01   | 49.8 (5.8)                                          | 36.6 (6.0)                    | 31.5 (7.7)                     | - (-)                  | 23.2          | <0.01   |

Values are expressed as mean (SD) unless stated otherwise. Included number of patients might be lower due to missing outcome measures. Correlation is statistically significant at the 0.05 level (two-tailed)

DAPSA = Disease Activity Psoriatic Arthritis Score, PASDAS = Psoriatic Arthritis Disease Activity Score, ASDAS = Ankylosing Spondylitis Disease Activity Score, BASDAI = Bath Ankylosing Spondylitis Disease Activity Index, PGA = Patient Global Assessment, VAS= Visual Analog Scale, PhGA = Physician Global Assessment, CRP = C-Reactive Protein, BSA = Body Surface Area, TJC68 = Tender Joint Count of 68 joints, SJC66 = Swollen Joint Count of 66 joints, HAQ-S = Health Assessment



---

Questionnaire for Spondyloarthritis, ASAS-HI = Assessment of SpondyloArthritis international Society Health Index, EQ-5D = EuroQol 5D, SF36 = Medical Outcomes Study 36-Question Short Form, MCS = Mental Component Score, PCS = Physical Component Score, SpA = spondyloarthritis, NA = Not Applicable

---

Supplementary Table 7. Outcome measures stratified for ASDAS disease activity states for peripheral SpA with and without psoriasis.

| Outcome measure                            | PASDAS<br>Peripheral SpA with psoriasis<br>n = 97 |                                  |                                  |                         |               |         | PASDAS<br>Peripheral SpA without psoriasis<br>n = 42 |                                 |                                  |                         |               |         |
|--------------------------------------------|---------------------------------------------------|----------------------------------|----------------------------------|-------------------------|---------------|---------|------------------------------------------------------|---------------------------------|----------------------------------|-------------------------|---------------|---------|
|                                            | PASDAS cut-offs                                   |                                  |                                  |                         | One-way ANOVA |         | PASDAS cut-offs                                      |                                 |                                  |                         | One-way ANOVA |         |
|                                            | ≤1.9<br>n = 17<br>(17.5%)                         | 1.9 to <3.2<br>n = 34<br>(35.1%) | 3.2 to <5.4<br>n = 42<br>(43.3%) | ≥5.4<br>n = 4<br>(4.1%) | F-value       | P-value | ≤1.9<br>n = 6<br>(14.3%)                             | 1.9 to <3.2<br>n = 6<br>(14.3%) | 3.2 to <5.4<br>n = 27<br>(64.3%) | ≥5.4<br>n = 3<br>(7.1%) | F-value       | P-value |
| DAPSA (0-∞)                                | 1.9 (2.1)                                         | 5.7 (2.9)                        | 14.4 (5.9)                       | 22.5 (3.7)              | 47.8          | <0.01   | 1.0 (0.9)                                            | 4.9 (3.0)                       | 11.6 (3.2)                       | 21.6 (5.0)              | 31.4          | <0.01   |
| PASDAS (0-10)                              | 1.2 (0.5)                                         | 2.7 (0.4)                        | 4.2 (0.6)                        | 5.8 (0.4)               | 211.1         | <0.01   | 0.6 (0.4)                                            | 2.7 (0.5)                       | 4.0 (0.5)                        | 5.9 (0.3)               | 111.3         | <0.01   |
| ASDAS (0-∞)                                | 0.9 (0.3)                                         | 1.5 (0.6)                        | 2.7 (0.7)                        | 3.5 (1.1)               | 41.1          | <0.01   | 0.8 (0.4)                                            | 1.4 (0.6)                       | 2.7 (0.7)                        | 3.2 (0.0)               | 20.6          | <0.01   |
| BASDAI (0-10)                              | 1.2 (0.9)                                         | 2.8 (1.6)                        | 5.2 (1.7)                        | 7.1 (1.6)               | 33.2          | <0.01   | 0.5 (0.2)                                            | 3.0 (0.2)                       | 5.7 (1.7)                        | 6.8 (2.4)               | 18.7          | <0.01   |
| PGA (0-10)                                 | 0.5 (0.7)                                         | 2.2 (1.1)                        | 5.5 (1.9)                        | 8.5 (0.6)               | 74.6          | <0.01   | 0.2 (0.4)                                            | 1.8 (1.0)                       | 5.6 (1.6)                        | 8.0 (1.7)               | 35.9          | <0.01   |
| VAS pain (0-10)                            | 1.0 (2.1)                                         | 2.7 (2.2)                        | 4.8 (1.9)                        | 7.6 (0.3)               | 18.5          | <0.01   | 0.5 (0.4)                                            | 2.2 (1.9)                       | 5.1 (1.7)                        | 7.1 (1.5)               | 16.3          | <0.01   |
| PhGA (0-10)                                | 0.4 (0.6)                                         | 1.4 (0.9)                        | 2.5 (0.9)                        | 5.6 (2.1)               | 44.8          | <0.01   | 0.1 (0.2)                                            | 1.6 (0.7)                       | 2.3 (1.1)                        | 5.6 (1.1)               | 23.3          | <0.01   |
| CRP, mg/L (0-∞)                            | 3.1 (2.7)                                         | 2.6 (3.2)                        | 5.6 (7.9)                        | 6.8 (6.8)               | 2.0           | 0.12    | 3.3 (3.9)                                            | 1.3 (0.8)                       | 4.4 (4.8)                        | 4.0 (5.2)               | 0.8           | 0.50    |
| Psoriasis BSA (0-100%)                     | 1.9 (3.8)                                         | 3.1 (10.7)                       | 1.1 (1.8)                        | 1.7 (2.1)               | 0.5           | 0.68    | -                                                    | -                               | -                                | -                       | -             | -       |
| TJC68 (0-68)                               | 0.1 (0.2)                                         | 0.4 (0.6)                        | 2.6 (3.9)                        | 3.8 (1.3)               | 7.1           | <0.01   | 0.0 (0.0)                                            | 0.2 (0.4)                       | 0.4 (0.7)                        | 2.3 (2.1)               | 7.0           | <0.01   |
| SJC66 (0-66)                               | 0.1 (0.2)                                         | 0.1 (0.3)                        | 0.7 (1.2)                        | 2.3 (2.2)               | 8.4           | <0.01   | 0.0 (0.0)                                            | 0.5 (0.8)                       | 0.1 (0.3)                        | 1.3 (1.5)               | 6.4           | <0.01   |
| LEI score (0-6)                            | 0.0 (0.0)                                         | 0.1 (0.2)                        | 0.0 (0.2)                        | 0.0 (0.0)               | 5.3           | 0.66    | 0.0 (0.0)                                            | 0.0 (0.0)                       | 0.1 (0.3)                        | 0.3 (0.6)               | 1.3           | 0.28    |
| Dactylitis count (0-20)                    | 0.0 (0.0)                                         | 0.0 (0.0)                        | 0.1 (0.5)                        | 0.3 (0.5)               | 1.0           | 0.41    | 0.0 (0.0)                                            | 0.0 (0.0)                       | 0.0 (0.0)                        | 0.0 (0.0)               | -             | -       |
| <b>Physical function and health impact</b> |                                                   |                                  |                                  |                         |               |         |                                                      |                                 |                                  |                         |               |         |
| HAQ-S (0-3)                                | 0.1 (2.0)                                         | 0.5 (0.4)                        | 1.2 (0.7)                        | 2.3 (-)                 | 16.3          | <0.01   | 0.1 (0.2)                                            | 0.4 (0.4)                       | 1.1 (0.5)                        | 1.8 (0.3)               | 11.9          | <0.01   |
| ASAS-HI (0-17)                             | 1.9 (2.0)                                         | 3.3 (2.3)                        | 6.9 (3.0)                        | 8.0 (4.6)               | 17.8          | <0.01   | 0.4 (0.5)                                            | 3.3 (1.8)                       | 7.4 (3.6)                        | 8.5 (0.7)               | 8.7           | <0.01   |
| <b>Health-related quality of life</b>      |                                                   |                                  |                                  |                         |               |         |                                                      |                                 |                                  |                         |               |         |
| EQ-5D (0-1)                                | 0.95 (0.07)                                       | 0.84 (0.11)                      | 0.69 (0.22)                      | 0.91 (0.13)             | 7.8           | <0.01   | 0.84 (0.22)                                          | 0.90 (0.08)                     | 0.71 (0.24)                      | 0.81 (-)                | 1.2           | 0.32    |
| SF36 MCS (0-100)                           | 53.5 (11.6)                                       | 48.6 (9.6)                       | 49.5 (11.0)                      | 44.7 (16.2)             | 1.1           | 0.35    | 56.5 (4.0)                                           | 54.1 (5.4)                      | 44.2 (11.6)                      | 58.9 (1.2)              | 4.8           | <0.01   |
| SF36 PCS (0-100)                           | 49.8 (8.1)                                        | 47.3 (7.8)                       | 34.3 (7.7)                       | 27.6 (11.7)             | 27.8          | <0.01   | 55.4 (2.4)                                           | 44.1 (6.6)                      | 36.6 (6.7)                       | 20.4 (2.3)              | 26.6          | <0.01   |

Values are expressed as mean (SD) unless stated otherwise. Included number of patients might be lower due to missing outcome measures. Correlation is statistically significant at the 0.05 level (two-tailed)

ASDAS = Ankylosing Spondylitis Disease Activity Score, PASDAS = Psoriatic Arthritis Disease Activity Score, DAPSA = Disease Activity Psoriatic Arthritis Score, BASDAI = Bath Ankylosing Spondylitis Disease Activity Index, PGA = Patient Global Assessment, VAS = Visual Analog Scale, PhGA = Physician Global Assessment, CRP = C-Reactive Protein, BSA = Body Surface Area, TJC68 = Tender Joint Count of 68 joints, SJC66 = Swollen Joint Count of 66 joints, LEI score = Leeds Enthesitis Index

---

score, HAQ-S = Health Assessment Questionnaire for Spondyloarthritis, ASAS-HI = Assessment of SpondyloArthritis international Society Health Index, EQ-5D = EuroQol 5D, SF36 = Medical Outcomes Study 36-Question Short Form, MCS = Mental Component Score, PCS = Physical Component Score, SpA = Spondyloarthritis, NA = Not Applicable

---

Supplementary Table 8. Outcome measures stratified for ASDAS disease activity states for peripheral SpA with and without psoriasis.

| Outcome measure                            | ASDAS<br>Peripheral SpA with psoriasis<br>n = 197 |                                  |                                  |                           |               |         | ASDAS<br>Peripheral SpA without psoriasis<br>n = 82 |                                  |                                  |                           |               |         |
|--------------------------------------------|---------------------------------------------------|----------------------------------|----------------------------------|---------------------------|---------------|---------|-----------------------------------------------------|----------------------------------|----------------------------------|---------------------------|---------------|---------|
|                                            | ASDAS cut-offs                                    |                                  |                                  |                           | One-way ANOVA |         | ASDAS cut-offs                                      |                                  |                                  |                           | One-way ANOVA |         |
|                                            | <1.3<br>n = 44<br>(22.3%)                         | 1.3 to <2.1<br>n = 66<br>(33.5%) | 2.1 to ≤3.5<br>n = 67<br>(34.0%) | >3.5<br>n = 20<br>(10.2%) | F-value       | P-value | <1.3<br>n = 15<br>(18.3%)                           | 1.3 to <2.1<br>n = 17<br>(20.7%) | 2.1 to ≤3.5<br>n = 38<br>(46.3%) | >3.5<br>n = 12<br>(14.6%) | F-value       | P-value |
| DAPSA (0-∞)                                | 3.4 (3.0)                                         | 7.1 (4.8)                        | 13.0 (6.8)                       | 18.3 (3.3)                | 35.8          | <0.01   | 2.8 (2.9)                                           | 7.5 (5.1)                        | 12.6 (3.9)                       | 14.1 (3.4)                | 16.3          | <0.01   |
| PASDAS (0-10)                              | 1.9 (0.9)                                         | 3.1 (1.0)                        | 4.1 (0.7)                        | 5.0 (0.7)                 | 42.2          | <0.01   | 1.3 (1.0)                                           | 3.1 (1.1)                        | 4.2 (0.8)                        | 4.5 (0.4)                 | 23.5          | <0.01   |
| ASDAS (0-∞)                                | 0.9 (0.3)                                         | 1.7 (0.2)                        | 2.6 (0.4)                        | 3.9 (0.4)                 | 506.7         | <0.01   | 0.8 (0.3)                                           | 1.8 (0.3)                        | 2.8 (0.4)                        | 3.9 (0.5)                 | 201.9         | <0.01   |
| BASDAI (0-10)                              | 1.5 (0.9)                                         | 3.2 (1.4)                        | 5.2 (1.5)                        | 7.0 (1.4)                 | 107.4         | <0.01   | 1.4 (0.8)                                           | 3.3 (1.5)                        | 5.6 (1.7)                        | 6.8 (1.4)                 | 40.8          | <0.01   |
| PGA (0-10)                                 | 1.3 (1.2)                                         | 3.1 (1.7)                        | 5.1 (2.1)                        | 7.6 (1.3)                 | 80.2          | <0.01   | 0.7 (0.7)                                           | 3.6 (2.0)                        | 5.4 (1.9)                        | 7.1 (1.6)                 | 37.8          | <0.01   |
| VAS pain (0-10)                            | 1.6 (2.1)                                         | 2.9 (2.0)                        | 5.1 (2.1)                        | 6.7 (1.0)                 | 41.2          | <0.01   | 1.6 (2.4)                                           | 3.0 (2.0)                        | 5.6 (1.6)                        | 5.5 (1.6)                 | 14.7          | <0.01   |
| PhGA (0-10)                                | 1.0 (1.1)                                         | 1.6 (1.2)                        | 2.2 (1.7)                        | 3.8 (2.0)                 | 12.0          | <0.01   | 0.8 (1.0)                                           | 1.5 (1.1)                        | 2.5 (1.7)                        | 2.2 (0.9)                 | 4.2           | 0.11    |
| CRP, mg/L (0-∞)                            | 1.7 (1.1)                                         | 2.4 (2.5)                        | 4.3 (4.8)                        | 12.8 (12.3)               | 25.8          | <0.01   | 1.5 (1.2)                                           | 2.7 (2.7)                        | 5.5 (6.8)                        | 19.2 (32.6)               | 5.0           | <0.01   |
| Psoriasis BSA (0-100%)                     | 3.2 (10.7)                                        | 1.1 (2.3)                        | 1.1 (1.3)                        | 2.0 (3.9)                 | 1.0           | 0.39    | NA                                                  | NA                               | NA                               | NA                        | NA            | NA      |
| TJC68 (0-68)                               | 0.3 (0.6)                                         | 0.8 (1.3)                        | 1.9 (3.6)                        | 2.5 (2.1)                 | 5.0           | <0.01   | 0.1 (0.3)                                           | 0.6 (1.2)                        | 0.9 (1.9)                        | 0.6 (0.8)                 | 1.0           | 0.40    |
| SJC66 (0-66)                               | 0.0 (0.2)                                         | 0.4 (0.8)                        | 0.6 (1.2)                        | 0.9 (1.4)                 | 3.4           | <0.05   | 0.2 (0.6)                                           | 0.5 (1.0)                        | 0.5 (1.6)                        | 0.0 (0.0)                 | 0.4           | 0.73    |
| LEI score (0-6)                            | 0.0 (0.0)                                         | 0.0 (0.2)                        | 0.1 (0.3)                        | 0.0 (0.0)                 | 1.6           | 0.18    | 0.0 (0.0)                                           | 0.2 (0.4)                        | 0.2 (0.5)                        | 0.3 (0.5)                 | 0.6           | 0.61    |
| Dactylitis count (0-20)                    | 0.1 (0.3)                                         | 0.0 (0.1)                        | 0.1 (0.3)                        | 0.1 (0.4)                 | 0.6           | 0.62    | 0.0 (0.0)                                           | 0.0 (0.0)                        | 0.0 (0.0)                        | 0.0 (0.0)                 | -             | -       |
| <b>Physical function and health impact</b> |                                                   |                                  |                                  |                           |               |         |                                                     |                                  |                                  |                           |               |         |
| HAQ-S (0-3)                                | 0.3 (0.3)                                         | 0.6 (0.6)                        | 1.0 (0.6)                        | 1.4 (0.7)                 | 19.7          | <0.01   | 0.2 (0.2)                                           | 0.6 (0.6)                        | 1.1 (0.5)                        | 1.2 (0.4)                 | 10.3          | <0.05   |
| ASAS-HI (0-17)                             | 2.4 (1.7)                                         | 4.3 (2.7)                        | 6.3 (3.4)                        | 8.1 (3.1)                 | 22.2          | <0.01   | 1.6 (1.3)                                           | 4.0 (2.7)                        | 8.1 (2.9)                        | 8.6 (3.6)                 | 15.3          | <0.01   |
| <b>Health-related quality of life</b>      |                                                   |                                  |                                  |                           |               |         |                                                     |                                  |                                  |                           |               |         |
| EQ-5D (0-1)                                | 0.92 (0.09)                                       | 0.81 (0.14)                      | 0.73 (0.14)                      | 0.63 (0.21)               | 18.6          | <0.01   | 0.95 (0.05)                                         | 0.83 (0.10)                      | 0.66 (0.23)                      | 0.64 (0.30)               | 4.8           | <0.05   |
| SF36 MCS (0-100)                           | 54.0 (8.2)                                        | 51.0 (10.1)                      | 48.3 (10.4)                      | 46.1 (12.7)               | 3.5           | <0.05   | 56.5 (3.3)                                          | 56.1 (7.9)                       | 41.2 (11.0)                      | 42.6 (12.2)               | 10.3          | <0.01   |
| SF36 PCS (0-100)                           | 48.9 (7.0)                                        | 43.3 (8.9)                       | 35.4 (8.8)                       | 30.8 (5.4)                | 32.1          | <0.01   | 50.0 (7.5)                                          | 41.0 (9.1)                       | 35.2 (6.4)                       | 31.0 (4.3)                | 15.4          | <0.01   |

Values are expressed as mean (SD) unless stated otherwise. Included number of patients might be lower due to missing outcome measures. Correlation is statistically significant at the 0.05 level (two-tailed)

ASDAS = Ankylosing Spondylitis Disease Activity Score, PASDAS = Psoriatic Arthritis Disease Activity Score, DAPSA = Disease Activity Psoriatic Arthritis Score, BASDAI = Bath Ankylosing Spondylitis Disease Activity Index, PGA = Patient Global Assessment, VAS = Visual Analog Scale, PhGA = Physician Global Assessment, CRP = C-Reactive Protein, BSA = Body Surface Area, TJC68 = Tender Joint Count of 68 joints, SJC66 = Swollen Joint Count of 66 joints, LEI score = Leeds Enthesitis Index

---

score, HAQ-S = Health Assessment Questionnaire for Spondyloarthritis, ASAS-HI = Assessment of SpondyloArthritis international Society Health Index, EQ-5D = EuroQol 5D, SF36 = Medical Outcomes Study 36-Question Short Form, MCS = Mental Component Score, PCS = Physical Component Score, SpA = Spondyloarthritis, NA = Not Applicable

---

**Supplementary Table 9. Spearman correlations of ASDAS with outcomes measures in axial SpA.**

| Outcome measure                            | Total axSpA<br>Population with $\geq 1$ ASDAS<br>n = 249 |            |
|--------------------------------------------|----------------------------------------------------------|------------|
|                                            | $R_s$                                                    | Hypothesis |
| <b>Disease activity</b>                    |                                                          |            |
| BASDAI‡                                    | 0.85*                                                    |            |
| PGA‡                                       | 0.85*                                                    |            |
| VAS pain                                   | 0.74*                                                    | +          |
| PhGA                                       | 0.36*                                                    | - L        |
| CRP ‡                                      | 0.47*                                                    |            |
| Psoriasis BSA                              | 0.12                                                     | - L        |
| TJC68                                      | 0.15                                                     | +          |
| SJC66                                      | 0.15                                                     | +          |
| LEI score                                  | 0.05                                                     | +          |
| Dactylitis count                           | -0.02                                                    | +          |
| <b>Physical function and health impact</b> |                                                          |            |
| HAQ-S                                      | 0.53                                                     | +          |
| ASAS-HI                                    | 0.56                                                     | +          |
| <b>Health-related quality of life</b>      |                                                          |            |
| EQ-5D                                      | -0.41                                                    | +          |
| SF36 MCS                                   | -0.30                                                    | +          |
| SF36 PCS                                   | -0.60                                                    | +          |

‡ ASDAS components, Individual components of the ASDAS were not included in the calculation of the frequency of confirmed hypotheses for concurrent validity, \*Correlation is statistically significant at the 0.05 level (two-tailed), + = strength of correlation as hypothesized, L = strength of correlation is lower than hypothesized, H = strength of correlation is higher than hypothesized

ASDAS = Ankylosing Spondylitis Disease Activity Score, BASDAI = Bath Ankylosing Spondylitis Disease Activity Index, PGA = Patient Global Assessment, VAS= Visual Analog Scale, PhGA = Physician Global Assessment, CRP = C-Reactive Protein, LEI score = Leeds Enthesitis Index score, BSA = Body Surface Area, TJC68 = Tender Joint Count of 68 joints, SJC = Swollen Joint Count of 66 joints, HAQ-S = Health Assessment Questionnaire for Spondyloarthritis, ASAS-HI = Assessment of SpondyloArthritis international Society Health Index, EQ-5D = EuroQol 5D, SF36 = Medical Outcomes Study 36-Question Short Form, MCS = Mental Component Score, PCS = Physical Component Score, SpA = Spondyloarthritis, pSpA = peripheral Spondyloarthritis, axSpA = Axial Spondyloarthritis

**Supplementary Table 10. Outcome measures stratified for ASDAS disease activity states in axial SpA.**

| Outcome measure                            | ASDAS                             |                                   |                          |             | One-way ANOVA |         |
|--------------------------------------------|-----------------------------------|-----------------------------------|--------------------------|-------------|---------------|---------|
|                                            | Total axSpA population<br>n = 249 |                                   |                          |             | F-value       | P-value |
|                                            | ASDAS cut-offs                    |                                   |                          |             |               |         |
| <1.3<br>n = 49<br>(19.7%)                  | 1.3 to <2.1<br>n = 64<br>(25.7%)  | 2.1 to ≤3.5<br>n = 114<br>(45.8%) | >3.5<br>n = 22<br>(8.8%) |             |               |         |
| ASDAS (0-∞)                                | 1.0 (0.3)                         | 1.7 (0.2)                         | 2.8 (0.4)                | 4.0 (0.5)   | 580.9         | <0.01   |
| BASDAI (0-10)                              | 1.6 (0.9)                         | 3.0 (1.2)                         | 5.3 (1.5)                | 7.4 (1.2)   | 154.1         | <0.01   |
| PGA (0-10)                                 | 1.3 (1.0)                         | 2.9 (1.6)                         | 5.7 (2.0)                | 7.5 (1.4)   | 118.9         | <0.01   |
| VAS pain (0-10)                            | 1.6 (1.9)                         | 3.0 (1.9)                         | 5.2 (1.9)                | 7.4 (0.7)   | 51.8          | <0.01   |
| PhGA (0-10)                                | 1.2 (1.0)                         | 1.5 (1.0)                         | 2.3 (1.7)                | 2.2 (1.6)   | 6.3           | <0.01   |
| CRP, mg/L (0-∞)                            | 1.7 (1.4)                         | 2.9 (2.9)                         | 4.9 (6.7)                | 16.5 (17.6) | 24.7          | <0.01   |
| TJC68 (0-68)                               | 0.1 (0.4)                         | 0.3 (0.7)                         | 0.5 (1.0)                | 0.0 (0.0)   | 2.4           | 0.07    |
| SJC66 (0-66)                               | 0.0 (0.0)                         | 0.1 (0.3)                         | 0.2 (0.6)                | 0.0 (0.0)   | 1.4           | 0.25    |
| LEI score (0-6)                            | 0.2 (0.6)                         | 0.0 (0.1)                         | 0.2 (0.6)                | 0.3 (0.7)   | 1.3           | 0.29    |
| Dactylitis count (0-20)                    | 0.0 (0.0)                         | 0.0 (0.1)                         | 0.0 (0.1)                | 0.0 (0.0)   | 0.4           | 0.79    |
| <b>Physical function and health impact</b> |                                   |                                   |                          |             |               |         |
| HAQ-S (0-3)                                | 0.3 (0.2)                         | 0.7 (0.5)                         | 0.8 (0.5)                | 1.1 (0.5)   | 15.1          | <0.01   |
| ASAS-HI (0-17)                             | 2.2 (2.3)                         | 5.2 (3.2)                         | 6.7 (3.1)                | 9.0 (3.9)   | 22.0          | <0.01   |
| <b>Health-related quality of life</b>      |                                   |                                   |                          |             |               |         |
| EQ-5D (0-1)                                | 0.89 (0.14)                       | 0.83 (0.14)                       | 0.74 (0.20)              | 0.62 (0.28) | 8.4           | <0.01   |
| SF36 MCS (0-100)                           | 55.0 (6.9)                        | 52.7 (10.0)                       | 47.4 (12.1)              | 37.8 (16.5) | 9.3           | <0.01   |
| SF36 PCS (0-100)                           | 48.6 (7.2)                        | 43.6 (8.7)                        | 37.7 (7.4)               | 32.7 (8.6)  | 21.5          | <0.01   |

Values are presented as mean (SD) unless stated otherwise.

DAPSA = Disease Activity Psoriatic Arthritis Score, PASDAS = Psoriatic Arthritis Disease Activity Score, ASDAS = Ankylosing Spondylitis Disease Activity Score, NSAID = Non-Steroidal Anti Inflammatory Drug, cDMARD = conventional Disease Modifying Anti-Rheumatic Drug, bDMARD = biological Disease Modifying Anti-Rheumatic Drug, BASDAI = Bath Ankylosing Spondylitis Disease Activity Index, PGA = Patient Global Assessment, VAS = Visual Analog Scale, PhGA = Physician Global Assessment, CRP = C-Reactive Protein, LEI score = Leeds Enthesitis Index score, HAQ-S = Health Assessment Questionnaire for Spondyloarthritis, ASAS-HI = Assessment of SpondyloArthritis international Society Health Index, EQ-5D = EuroQoL 5D, SF36 = Medical Outcomes Study 36-Question Short Form, MCS = Mental Component Score, PCS = Physical Component Score, SpA = Spondyloarthritis, NA = not applicable
